# Supplementary material for: Cation exchanger mixed matrix membrane for copper removal
Source: Hindawi journal article supplement (doi:10.1155/2011/710438), 2012-03-01
Supplement: f1 [file 710438.f1.pdf]

## 2k/1b – PCR and sequencing design for CYHCV037

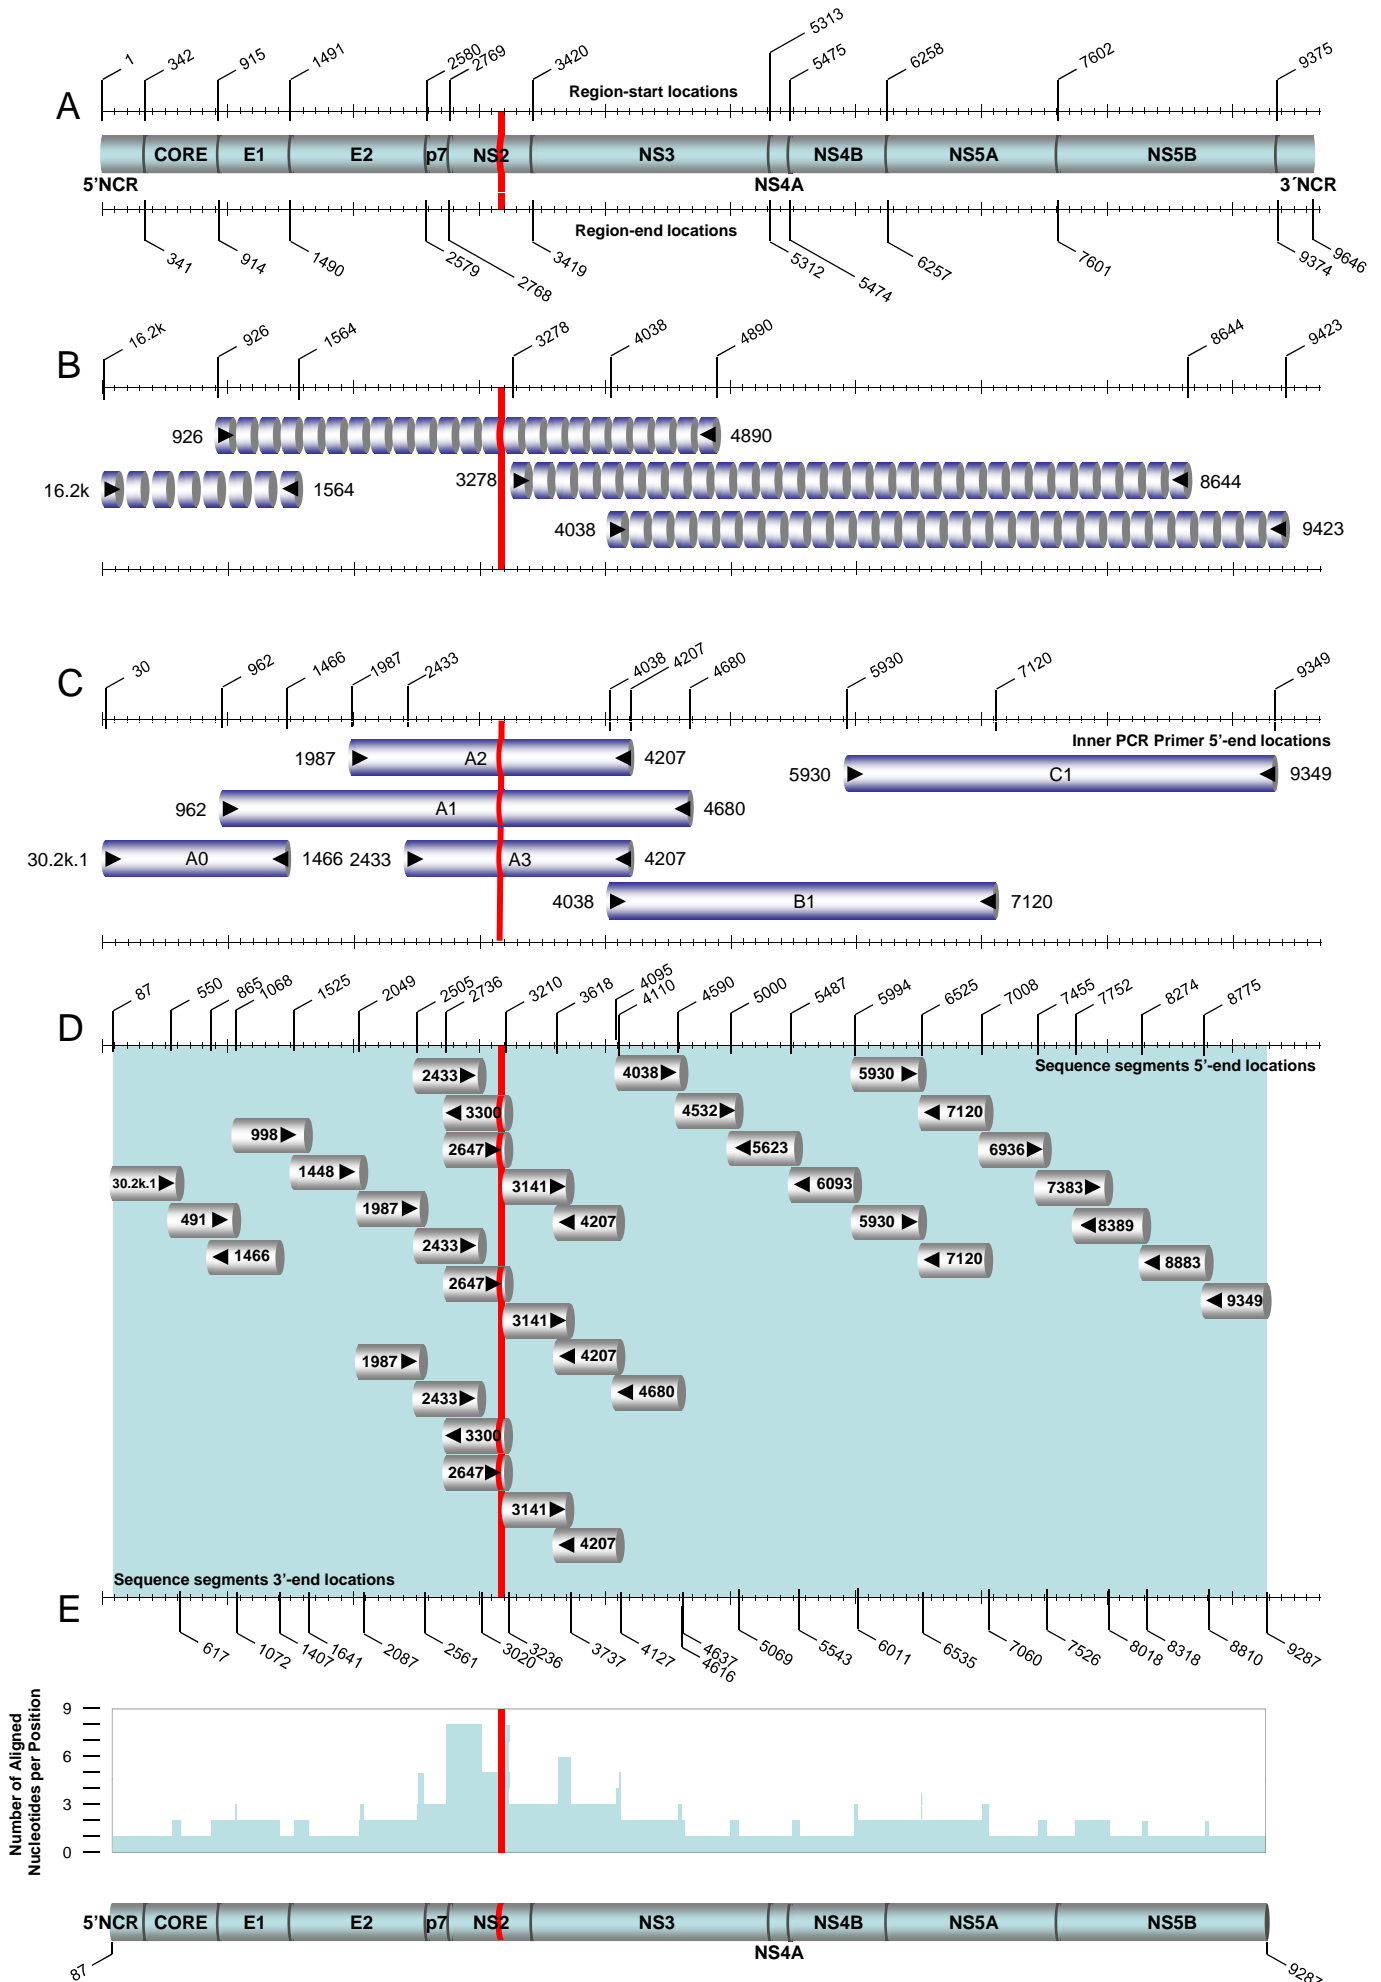

Supplementary figure 1
