# Supplementary material for: Cation exchanger mixed matrix membrane for copper removal
Source: Hindawi journal article supplement (doi:10.1155/2011/710438), 2012-03-01
Supplement: f3 [file 710438.f3.pdf]

Supplementary table 1. PCR and sequencing primers

| <i>Designation</i> <sup>a</sup> | <i>Sequence</i> <sup>b</sup> | <i>Position</i> <sup>c</sup> |
|---------------------------------|------------------------------|------------------------------|
| <b>PCR primers</b>              |                              |                              |
| 16.2k (F) <sup>d</sup>          | GGGGCGACACTCCGC              | 16-30                        |
| 30.2k.1 (F) <sup>d,e</sup>      | CCATGAATCACTCCCCTGTGAGG      | 30-52                        |
| 926 (F)                         | GAACACCAGTCAGACCTACATGG      | 926-948                      |
| 962 (F)                         | CTCTAACAGCAGCATCACGTGG       | 962-983                      |
| 1466 (R) <sup>e</sup>           | GAGGATGACGACGACCTTGG         | 1447-1466                    |
| 1564 (R)                        | GAAAAGGCTGGTAAGGCCAAGC       | 1543-1564                    |
| 1987 (F) <sup>d,e</sup>         | GGTTTGGATGCACATGGATGAATGG    | 1987-2011                    |
| 2433 (F) <sup>e</sup>           | GACGTGCAGTACTTGTATGGCC       | 2433-2454                    |
| 3278 (F) <sup>d</sup>           | GGAGACCAAGATCATCACCTGGG      | 3278-3300                    |
| 3300 (R) <sup>d,e</sup>         | CCCAGGTGATGATCTTGGTCTCC      | 3278-3300                    |
| 4038 (F) <sup>d,e</sup>         | GGCAGCGGCAAGAGCAC            | 4038-4054                    |
| 4207 (R) <sup>e</sup>           | GCACCTGTGGTGATGGTCC          | 4189-4207                    |
| 4680 (R) <sup>d,e</sup>         | CGCCGGTRWAGCCCCGTC           | 4664-4680                    |
| 4890 (R)                        | GGACCGAGGAGTCAAACATGC        | 4870-4890                    |
| 5478 (R) <sup>d</sup>           | AGGCGCACTTCCATYTCATC         | 5457-5478                    |
| 5930 (F) <sup>d,e</sup>         | CGTGGCCTTTAAGGTYATGAGCG      | 5930-5952                    |
| 7120 (R) <sup>d,e</sup>         | CGRAGCGGGTCRAAAGAGTC         | 7101-7120                    |
| 8644 (R) <sup>d</sup>           | GCTGAGTACCTAGTCATAGCCTCCG    | 8620-8644                    |
| 9349 (R) <sup>d,e</sup>         | ACCCCTACAGAAAGTAGGAGTAGGC    | 9325-9349                    |
| 9423 (R) <sup>d</sup>           | AAAAAACAGGATGGCCTATTGGCC     | 9397-9423                    |
| <b>Sequencing Primers</b>       |                              |                              |
| 491 (F)                         | GAAGACTTCCGAGCGGTCC          | 491-509                      |
| 527 (F)                         | CCAGCCCATCCCTAAAGATCG        | 527-547                      |
| 998 (F)                         | GGTACTACATGTCCCTGGATGC       | 998-1019                     |
| 1448 (R)                        | CAAGGTCGTCGTCATCCTCC         | 1448-1467                    |
| 2131 (R)                        | CATTTGGTGTAAGTAGCCTCAGGG     | 2108-2131                    |
| 2647 (F)                        | CCATCTTCTTCATAGCTGCCTGG      | 2647-2669                    |
| 3141 (F)                        | GTCCAGATGATGCTGCTAACCC       | 3141-3162                    |
| 4532 (F)                        | GAAGAAATGTGATGAGCTCGCTGC     | 4532-4555                    |
| 5009 (F)                        | GTTCTGGGAGAGCGTCTTCAC        | 5009-5029                    |
| 5623 (R)                        | CAGAAGGTCTCAAGGGCTCG         | 5604-5623                    |
| 6093 (R)                        | GGTTCATCCACTGCACAGCC         | 6074-6093                    |
| 6931 (F)                        | CCCTGGCTAGCTCTTCTGC          | 6931-6949                    |
| 6936 (F)                        | GCCAGCTCTTCAGCTAGTCAG        | 6936-6956                    |
| 7383 (F)                        | GCTACAAAGACCTTCGGCAGC        | 7383-7403                    |
| 8389 (R)                        | CCGATATAAAGTCGCTCTGTGAGC     | 8366-8389                    |
| 8883 (R)                        | GAGTCATCAGAATCATCCTTGCCC     | 8860-8883                    |

<sup>a</sup> Orientation of the PCR primer is indicated in parenthesis: F, forward; R, reverse.

<sup>b</sup> IUB base codes annotate equimolar mixtures of bases in the oligonucleotides: Y, C and T; R, A and G; W, A and T.

<sup>c</sup> Positions are numbered according to HCV strain H77, GenBank accession no. NC\_004102.

<sup>d</sup> Modified from Noppornpanth *et al.*, 2006; all other primers were designed *de novo* for this study.

<sup>e</sup> Also used as sequencing primers.
